# Supplementary material
Source: PubMed Central journal article supplement (PMC8862074)
Supplement: jech-2021-216445supp001.pdf [file jech-2021-216445supp001.pdf]

**Table S1. Stratified analysis of the association between ADI and hypertension in the Sister Study**

| ADI                            |            | <=10 %      | 11-20 %        | 21-35 %        | 36-55 %       | >55%           | P for trend |
|--------------------------------|------------|-------------|----------------|----------------|---------------|----------------|-------------|
| <b>Race/Ethnicity</b>          |            |             |                |                |               |                |             |
| Non-Hispanic white             | N          | 7979        | 7393           | 8796           | 8359          | 7737           |             |
|                                | PR (95%CI) | 1(referent) | 1.13(1.08,1.2) | 1.16(1.11,1.2) | 1.2(1.16,1.3) | 1.27(1.2,1.3)  | <0.001      |
| Non-Hispanic Black             | N          | 337         | 503            | 800            | 1000          | 1598           |             |
|                                | PR (95%CI) | 1(referent) | 1.2(1.1,1.4)   | 1.2(1.1,1.4)   | 1.2(1.1,1.4)  | 1.2(1.1,1.4)   | 0.15        |
| Hispanic                       | N          | 263         | 247            | 351            | 295           | 395            |             |
|                                | PR (95%CI) | 1(referent) | 1.1(0.78,1.5)  | 1.3(0.95,1.7)  | 1.4(1.02,1.8) | 1.4(1.06,1.9)  | 0.01        |
| Others                         | N          | 258         | 199            | 230            | 256           | 333            |             |
|                                | PR (95%CI) | 1(referent) | 1.3(1.01,1.8)  | 1.4(1.03,1.8)  | 1.5(1.1,2.0)  | 1.7(1.3,2.2)   | <0.001      |
| p for interaction              |            |             |                |                |               |                | <0.001      |
| <b>Educational attainment</b>  |            |             |                |                |               |                |             |
| High school or less            | N          | 549         | 938            | 1498           | 1842          | 2274           |             |
|                                | PR (95%CI) | 1(referent) | 1.1(0.95,1.2)  | 1.1(0.95,1.2)  | 1.1(0.98,1.2) | 1.1(0.98,1.2)  | 0.19        |
| Some college                   | N          | 2123        | 2570           | 3400           | 3758          | 4128           |             |
|                                | PR (95%CI) | 1(referent) | 1.1(1,1.2)     | 1.2(1.1,1.3)   | 1.2(1.1,1.3)  | 1.2(1.2,1.3)   | <0.001      |
| Bachelor's degree or more      | N          | 6165        | 4834           | 5279           | 4310          | 3661           |             |
|                                | PR (95%CI) | 1(referent) | 1.2(1.1,1.3)   | 1.2(1.1,1.3)   | 1.3(1.2,1.4)  | 1.33(1.25,1.4) | <0.001      |
| p for interaction              |            |             |                |                |               |                | 0.001       |
| <b>Annual household income</b> |            |             |                |                |               |                |             |
| ≤\$49,999                      | N          | 788         | 1221           | 2197           | 3046          | 4416           |             |
|                                | PR (95%CI) | 1(referent) | 1.2(1.04,1.3)  | 1.2(1.1,1.4)   | 1.3(1.2,1.4)  | 1.3(1.2,1.4)   | <0.001      |

|                                          |            |             |                |                 |                 |                 |        |
|------------------------------------------|------------|-------------|----------------|-----------------|-----------------|-----------------|--------|
| \$50,000-\$99,999                        | N          | 2615        | 3352           | 4619            | 4659            | 4243            |        |
|                                          | PR (95%CI) | 1(referent) | 1.1(1.03,1.2)  | 1.15(1.07,1.23) | 1.2(1.1,1.3)    | 1.24(1.16,1.33) | <0.001 |
| ≥\$100,000                               | N          | 5434        | 3769           | 3361            | 2205            | 1404            |        |
|                                          | PR (95%CI) | 1(referent) | 1.18(1.1,1.26) | 1.18(1.1,1.27)  | 1.22(1.13,1.32) | 1.24(1.14,1.35) | <0.001 |
| p for interaction                        |            |             |                |                 |                 |                 | 0.54   |
| BMI (kg/m <sup>2</sup> )                 |            |             |                |                 |                 |                 |        |
| BMI<30                                   | N          | 7187        | 6283           | 7032            | 6507            | 6057            |        |
|                                          | PR (95%CI) | 1(referent) | 1.1(1.05,1.2)  | 1.1(1.07,1.2)   | 1.2(1.1,1.3)    | 1.22(1.15,1.3)  | <0.001 |
| BMI≥30                                   | N          | 1645        | 2058           | 3143            | 3401            | 4000            |        |
|                                          | PR (95%CI) | 1(referent) | 1.11(1.04,1.2) | 1.08(1.01,1.14) | 1.11(1.05,1.17) | 1.10(1.04,1.17) | 0.03   |
| p for interaction                        |            |             |                |                 |                 |                 | <0.001 |
| MET hours per week on exercise or sports |            |             |                |                 |                 |                 |        |
| <5                                       | N          | 2278        | 2618           | 3780            | 3971            | 4705            |        |
|                                          | PR (95%CI) | 1(referent) | 1.07(1.00,1.2) | 1.10(1.03,1.2)  | 1.16(1.08,1.2)  | 1.16(1.08,1.2)  | <0.001 |
| 5-14                                     | N          | 2621        | 2538           | 3110            | 2976            | 2938            |        |
|                                          | PR (95%CI) | 1(referent) | 1.11(1.02,1.2) | 1.16(1.08,1.3)  | 1.18(1.09,1.3)  | 1.21(1.13,1.3)  | <0.001 |
| ≥15                                      | N          | 3933        | 3184           | 3277            | 2956            | 2414            |        |
|                                          | PR (95%CI) | 1(referent) | 1.24(1.1,1.3)  | 1.20(1.1,1.3)   | 1.28(1.2,1.4)   | 1.29(1.2,1.4)   | <0.001 |
| p for interaction                        |            |             |                |                 |                 |                 | 0.002  |

Results shown are from fully-adjusted models (not including the stratification variable).

High ADI represents high deprivation.

Missing sample size for exercise or sports MET-hours was 30, for BMI was 16.

**Table S2. ADI and risk of hypertension stratified by race, household income, educational attainment, and MET hours on exercise/sports (common referent)**

| ADI                            |            | <=10 %          | 11-20 %         | 21-35 %         | 36-55 %         | >55%            |
|--------------------------------|------------|-----------------|-----------------|-----------------|-----------------|-----------------|
| <b>Race/Ethnicity</b>          |            |                 |                 |                 |                 |                 |
| Non-Hispanic white             | N          | 7979            | 7393            | 8796            | 8359            | 7737            |
|                                | PR (95%CI) | 1 (referent)    | 1.14(1.08,1.2)  | 1.17(1.12,1.23) | 1.24(1.18,1.3)  | 1.30(1.24,1.37) |
| Hispanic                       | N          | 263             | 247             | 351             | 295             | 395             |
|                                | PR (95%CI) | 0.93(0.74,1.17) | 0.98(0.77,1.24) | 1.14(0.96,1.35) | 1.21(1.02,1.43) | 1.24(1.07,1.43) |
| Non-Hispanic Black             | N          | 337             | 503             | 800             | 1000            | 1598            |
|                                | PR (95%CI) | 1.65(1.47,1.86) | 1.96(1.83,2.09) | 1.96(1.84,2.08) | 1.97(1.87,2.07) | 1.88(1.79,1.98) |
| <b>Educational attainment</b>  |            |                 |                 |                 |                 |                 |
| High school or less            | N          | 549             | 938             | 1498            | 1842            | 2274            |
|                                | PR (95%CI) | 1.41(1.26,1.57) | 1.54(1.41,1.68) | 1.53(1.42,1.65) | 1.56(1.46,1.66) | 1.53(1.44,1.63) |
| Some college                   | N          | 2123            | 2570            | 3400            | 3758            | 4128            |
|                                | PR (95%CI) | 1.25(1.16,1.35) | 1.36(1.27,1.46) | 1.46(1.37,1.55) | 1.51(1.43,1.6)  | 1.51(1.43,1.6)  |
| Bachelor's degree or more      | N          | 6165            | 4834            | 5279            | 4310            | 3661            |
|                                | PR (95%CI) | 1 (referent)    | 1.2(1.13,1.28)  | 1.21(1.14,1.28) | 1.3(1.22,1.38)  | 1.39(1.31,1.47) |
| <b>Annual household income</b> |            |                 |                 |                 |                 |                 |
| ≤\$49,999                      | N          | 788             | 1221            | 2197            | 3046            | 4416            |
|                                | PR (95%CI) | 1.13(1.02,1.26) | 1.32(1.22,1.43) | 1.4(1.31,1.49)  | 1.43(1.34,1.52) | 1.42(1.34,1.51) |
| \$50,000-\$99,999              | N          | 2615            | 3352            | 4619            | 4659            | 4243            |
|                                | PR (95%CI) | 1.13(1.05,1.22) | 1.26(1.18,1.35) | 1.31(1.23,1.39) | 1.39(1.31,1.47) | 1.43(1.35,1.52) |
| ≥\$100,000                     | N          | 5434            | 3769            | 3361            | 2205            | 1404            |

|                                       | PR (95%CI) | 1(referent)     | 1.2(1.12,1.29)  | 1.19(1.1,1.28)  | 1.25(1.16,1.35) | 1.29(1.18,1.4)  |
|---------------------------------------|------------|-----------------|-----------------|-----------------|-----------------|-----------------|
| Exercise or sports MET hours per week |            |                 |                 |                 |                 |                 |
| <5                                    | N          | 2278            | 2618            | 3780            | 3971            | 4705            |
|                                       | PR (95%CI) | 1.57(1.45,1.71) | 1.69(1.57,1.83) | 1.74(1.62,1.87) | 1.79(1.67,1.92) | 1.76(1.65,1.89) |
| 5-14                                  | N          | 2621            | 2538            | 3110            | 2976            | 2938            |
|                                       | PR (95%CI) | 1.33(1.23,1.45) | 1.47(1.35,1.59) | 1.54(1.43,1.66) | 1.56(1.45,1.68) | 1.63(1.51,1.75) |
| >=15                                  | N          | 3933            | 3184            | 3277            | 2956            | 2414            |
|                                       | PR (95%CI) | 1(referent)     | 1.25(1.15,1.36) | 1.22(1.12,1.32) | 1.33(1.23,1.45) | 1.4(1.29,1.51)  |

Models were adjusted for age, race, annual household income, and educational attainment. High ADI represents high deprivation.

Missing sample size for exercise or sports MET-hours was 30

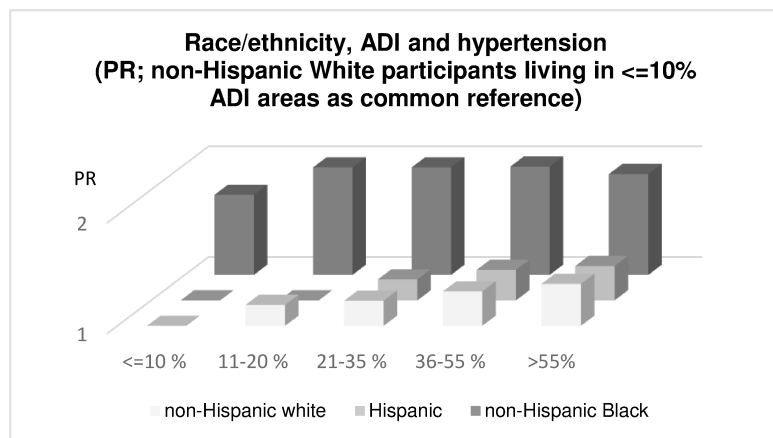

A

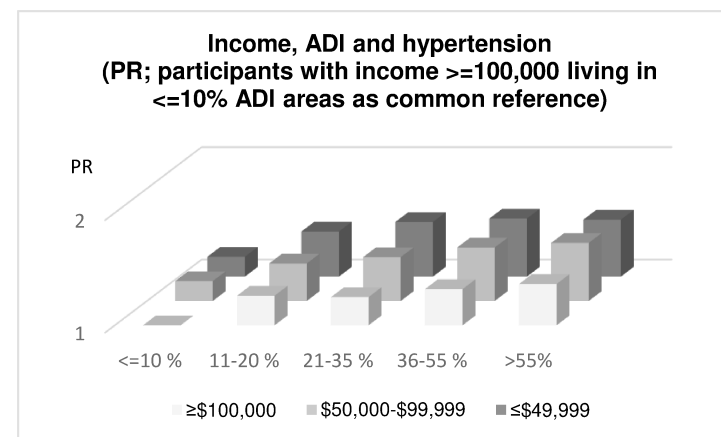

B

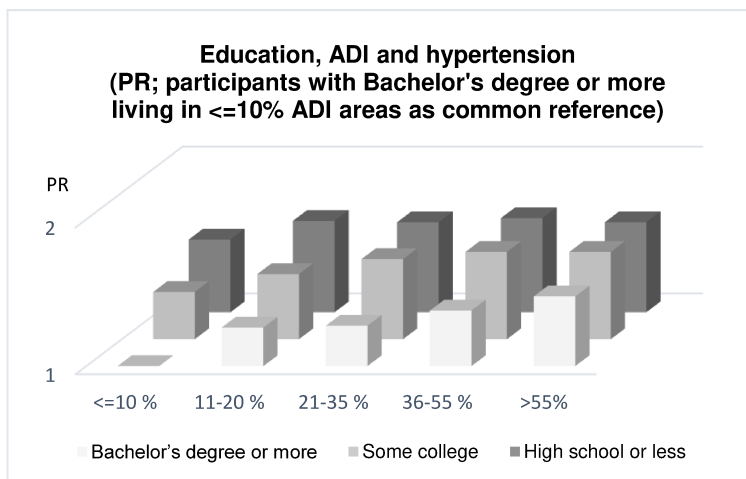

C

**Figure S1. ADI and risk of hypertension stratified by race/ethnicity, annual household income and educational attainment (common reference)**

**Table S3. Relative excess risk due to interaction (RERI)/interaction contrast ratio (ICR) between ADI and covariates**

| ADI                     | 11-20 %           | 21-35 %           | 36-55 %           | >55%              |
|-------------------------|-------------------|-------------------|-------------------|-------------------|
| Educational attainment  |                   |                   |                   |                   |
| High school or less     | 0.16(-0.26,0.57)  | 0.01(-0.37,0.38)  | 0.11(-0.27,0.49)  | -0.06(-0.43,0.32) |
| Some college            | -0.06(-0.28,0.16) | 0.14(-0.08,0.35)  | 0.15(-0.07,0.37)  | 0.12(-0.11,0.36)  |
| Annual household Income |                   |                   |                   |                   |
| ≤\$49,999               | 0.05(-0.22,0.32)  | 0.25(0,0.5)       | 0.21(-0.05,0.46)  | 0.38(0.12,0.65)   |
| \$50,000-\$99,999       | -0.09(-0.28,0.1)  | 0.03(-0.15,0.21)  | 0.03(-0.18,0.23)  | 0.09(-0.15,0.32)  |
| Race/Ethnicity          |                   |                   |                   |                   |
| Non-Hispanic Black      | 0.64(-0.13,1.41)  | 1.1(0.34,1.9)     | 1.3(0.45,2.1)     | 1.9(0.94,2.8)     |
| Hispanic                | -0.13(-0.32,0.06) | -0.03(-0.22,0.16) | -0.05(-0.28,0.17) | -0.02(-0.27,0.24) |

Results shown are from fully-adjusted models (not including the stratification variable).  
High ADI represents high deprivation.

**Table S4. Distribution of exercise/sports MET-hours per week and diet indexes according to ADI percentile [N (%)]**

| ADI                                                       | <=10<br>(n=8837) | 11-20 %<br>(n=8342) | 21-35 %<br>(n=10177) | 36-55 %<br>(n=9910) | >55%<br>(n=10063) |
|-----------------------------------------------------------|------------------|---------------------|----------------------|---------------------|-------------------|
| MET-hours per week on exercise or sports                  |                  |                     |                      |                     |                   |
| <5                                                        | 2278(26)         | 2618(31)            | 3780(37)             | 3971(40)            | 4705(47)          |
| 5-14                                                      | 2621(30)         | 2538(30)            | 3110(31)             | 2976(30)            | 2938(29)          |
| >=15                                                      | 3933(44)         | 3184(38)            | 3277(32)             | 2956(30)            | 2414(24)          |
| Missing                                                   | 5                | 2                   | 10                   | 7                   | 6                 |
| Dietary Approaches to Stop Hypertension (DASH) diet score |                  |                     |                      |                     |                   |
| 8-21                                                      | 1831(21)         | 2106(26)            | 2882(29)             | 3238(34)            | 3852(40)          |
| 22-26                                                     | 3298(38)         | 3050(38)            | 3753(38)             | 3557(37)            | 3418(35)          |
| 27-39                                                     | 3470(40)         | 2954(37)            | 3271(33)             | 2813(29)            | 2413(25)          |
| Missing                                                   | 238              | 232                 | 271                  | 302                 | 380               |

High ADI represents high deprivation.

**Table S5. Sensitivity analyses**

| ADI                | Excluding participants who began living at current residence after 2000 (N=29,994) |                 | Using new definition of hypertension <sup>*</sup> (N=47,329) |                 | Additionally adjusted for DASH diet score (N=45,906) |                 |
|--------------------|------------------------------------------------------------------------------------|-----------------|--------------------------------------------------------------|-----------------|------------------------------------------------------|-----------------|
|                    | N                                                                                  | PR (95%CI)      | N                                                            | PR (95%CI)      | N                                                    | PR (95%CI)      |
| <=10 %             | 5944                                                                               | 1(referent)     | 8837                                                         | 1(referent)     | 8599                                                 | 1(referent)     |
| 11-20 %            | 5175                                                                               | 1.16(1.10,1.23) | 8342                                                         | 1.07(1.03,1.11) | 8110                                                 | 1.14(1.09,1.19) |
| 21-35 %            | 6332                                                                               | 1.19(1.13,1.25) | 10177                                                        | 1.11(1.07,1.14) | 9906                                                 | 1.16(1.12,1.22) |
| 36-55 %            | 6117                                                                               | 1.24(1.18,1.31) | 9910                                                         | 1.16(1.12,1.2)  | 9608                                                 | 1.21(1.16,1.27) |
| >55%               | 6426                                                                               | 1.27(1.21,1.34) | 10063                                                        | 1.16(1.12,1.2)  | 9683                                                 | 1.21(1.16,1.26) |
| <i>P</i> for trend |                                                                                    | <0.001          |                                                              | <0.001          |                                                      | <0.001          |

Adjusted for age, race, annual household income, and educational attainment.

DASH: Dietary Approaches to Stop Hypertension diet;

High ADI represents high deprivation.

<sup>\*</sup> Using new definition for hypertension (either sbp≥130 or dbp≥80 or regularly taking meds) as outcome



**Table S6. ADI Index and continuous BP measures among participants not on antihypertensive medications (N=32,612)**

| ADI                | n    | SBP $\beta$ estimate (95%CI) | DBP $\beta$ estimate (95%CI) | PP * $\beta$ estimate (95%CI) | MAP * $\beta$ estimate (95%CI) |
|--------------------|------|------------------------------|------------------------------|-------------------------------|--------------------------------|
| <=10 %             | 6775 | referent                     | referent                     | referent                      | referent                       |
| 11-20 %            | 6003 | 0.09(-0.33,0.51)             | -0.11(-0.40,0.20)            | 0.20(-0.10,0.50)              | -0.04(-0.35,0.27)              |
| 21-35 %            | 7065 | 0.72(0.31,1.13)              | 0.20(-0.09,0.48)             | 0.52(0.23,0.81)               | 0.37(0.07,0.67)                |
| 36-55 %            | 6531 | 1.1(0.68,1.5)                | 0.40(0.10,0.70)              | 0.71(0.40,1.01)               | 0.64(0.32,0.95)                |
| >55%               | 6238 | 1.9(1.5,2.4)                 | 0.82(0.51,1.1)               | 1.1(0.78,1.4)                 | 1.2(0.86,1.5)                  |
| <i>P</i> for trend |      | <0.001                       | <0.001                       | <0.001                        | <0.001                         |

Abbreviations: SBP-systolic blood pressure, DBP-diastolic blood pressure, PP-pulse pressure, MAP-mean arterial pressure.

Models were Adjusted for age, race, annual household income, and educational attainment.

High ADI represents high deprivation.

\* PP=SBP-DBP; MAP=1/3(SBP)+2/3(DBP).
